# Supplementary material
Source: publisher figshare collection journal article supplement (https://frontiersin.figshare.com/ndownloader/files/24231896)
Supplement: Supplementary file [file 24231896]

## Supplemental Materials

| Datasets used for 4 Symptom Stochastic Progression Models |              |                                           |                                          |                                               |                                                  |                                           |                                    |                                    |
|-----------------------------------------------------------|--------------|-------------------------------------------|------------------------------------------|-----------------------------------------------|--------------------------------------------------|-------------------------------------------|------------------------------------|------------------------------------|
|                                                           | Random       | COVID-19<br>with<br>N=55,924 <sup>1</sup> | COVID-19<br>with<br>N=1,099 <sup>2</sup> | Severe<br>COVID-19<br>with N=173 <sup>2</sup> | Nonsevere<br>COVID-19<br>with N=926 <sup>2</sup> | Influenza<br>with<br>N=2,470 <sup>3</sup> | MERS<br>with<br>N=245 <sup>4</sup> | SARS<br>with<br>N=357 <sup>4</sup> |
| <b>Fever</b>                                              | <b>0.500</b> | <b>0.879</b>                              | <b>0.887</b>                             | <b>0.881</b>                                  | <b>0.919</b>                                     | <b>0.680</b>                              | <b>0.841</b>                       | <b>0.997</b>                       |
| <b>Cough</b>                                              | <b>0.500</b> | <b>0.677</b>                              | <b>0.678</b>                             | <b>0.673</b>                                  | <b>0.705</b>                                     | <b>0.930</b>                              | <b>0.633</b>                       | <b>0.583</b>                       |
| <b>Nausea/<br/>Vomiting</b>                               | <b>0.500</b> | <b>0.050</b>                              | <b>0.050</b>                             | <b>0.046</b>                                  | <b>0.069</b>                                     | <b>0.010*</b>                             | <b>0.151</b>                       | <b>0.154</b>                       |
| <b>Diarrhea</b>                                           | <b>0.500</b> | <b>0.037</b>                              | <b>0.038</b>                             | <b>0.035</b>                                  | <b>0.058</b>                                     | <b>0.010*</b>                             | <b>0.204</b>                       | <b>0.174</b>                       |

\*Although adult patients at times may experience vomiting and diarrhea when infected with influenza, these symptoms are rare<sup>5</sup>. Therefore we approximate the frequency of these symptoms as 0.010 in this case.

### Supplemental Table 1 Frequencies of Four Symptoms from Various Clinical Datasets

Frequencies that were used to simulate patients for the Stochastic Progression Model of discernible symptoms.

| <b>Datasets used for 7 Symptom Stochastic Progression Models</b> |                                                   |                                                  |                                                   |                                            |                                            |
|------------------------------------------------------------------|---------------------------------------------------|--------------------------------------------------|---------------------------------------------------|--------------------------------------------|--------------------------------------------|
|                                                                  | <b>COVID-19<br/>with<br/>N=55,924<sup>1</sup></b> | <b>COVID-19<br/>with<br/>N=1,099<sup>2</sup></b> | <b>Influenza<br/>with<br/>N=2,470<sup>3</sup></b> | <b>MERS<br/>with<br/>N=245<sup>4</sup></b> | <b>SARS<br/>with<br/>N=357<sup>4</sup></b> |
| <b>Fever</b>                                                     | <b>0.879</b>                                      | <b>0.887</b>                                     | <b>0.680</b>                                      | <b>0.841</b>                               | <b>0.997</b>                               |
| <b>Cough</b>                                                     | <b>0.677</b>                                      | <b>0.678</b>                                     | <b>0.930</b>                                      | <b>0.633</b>                               | <b>0.583</b>                               |
| <b>Sore<br/>Throat</b>                                           | <b>0.139</b>                                      | <b>0.139</b>                                     | <b>0.840</b>                                      | <b>0.135</b>                               | <b>0.171</b>                               |
| <b>Headache</b>                                                  | <b>0.136</b>                                      | <b>0.136</b>                                     | <b>0.910</b>                                      | <b>0.188</b>                               | <b>0.389</b>                               |
| <b>Myalgia*</b>                                                  | <b>0.148</b>                                      | <b>0.149</b>                                     | <b>0.940</b>                                      | <b>0.400</b>                               | <b>0.591</b>                               |
| <b>Nausea/<br/>Vomiting</b>                                      | <b>0.050</b>                                      | <b>0.050</b>                                     | <b>0.010**</b>                                    | <b>0.151</b>                               | <b>0.154</b>                               |
| <b>Diarrhea</b>                                                  | <b>0.037</b>                                      | <b>0.038</b>                                     | <b>0.010**</b>                                    | <b>0.204</b>                               | <b>0.174</b>                               |

\*For the two COVID-19 datasets myalgia is reported as myalgia or arthralgia. We assume most of these cases have myalgia and use it as the frequency for myalgia.

\*\*Although adult patients at times may experience vomiting and diarrhea when infected with influenza, these symptoms are rare<sup>5</sup>. Therefore we approximate the frequency of these symptoms as 0.010 in this case.

### **Supplemental Table 2 Frequencies of Seven Symptoms from Various Clinical Datasets**

Frequencies that were used to simulate patients for the Stochastic Progression Model of commonly observed symptoms in respiratory disease.

| <b>Initial Symptoms in MERS<sup>6</sup></b> |                          |                       |                            |                |
|---------------------------------------------|--------------------------|-----------------------|----------------------------|----------------|
|                                             | <b>Without Pneumonia</b> | <b>With Pneumonia</b> | <b>Respiratory Failure</b> | <b>Overall</b> |
| <b>Fever</b>                                | <b>0.182</b>             | <b>0.714</b>          | <b>0.778</b>               | <b>0.559</b>   |
| <b>Cough</b>                                | <b>0.308</b>             | <b>0.316</b>          | <b>0.385</b>               | <b>0.333</b>   |
| <b>Myalgia</b>                              | <b>0.385</b>             | <b>0.526</b>          | <b>0.154</b>               | <b>0.378</b>   |
| <b>Diarrhea</b>                             | <b>0.000</b>             | <b>0.053</b>          | <b>0.154</b>               | <b>0.067</b>   |

### **Supplemental Table 3 Initial Symptom Frequency in MERS**

Frequency of symptoms reported by patient as initial in one dataset for MERS, overall and separated by eventual condition of patient.

|                         | <b>Initial Symptoms in SARS<sup>7</sup></b> |
|-------------------------|---------------------------------------------|
| <b>Fever</b>            | <b>0.736</b>                                |
| <b>Cough or Dyspnea</b> | <b>0.354</b>                                |
| <b>Diarrhea</b>         | <b>0.063</b>                                |

#### **Supplemental Table 4 Initial Symptom Frequency in SARS**

Frequency of symptoms reported by patient as initial in one dataset for SARS.

| <b>Datasets used for Sensitivity and Specificity Calculations</b> |                                        |                                        |                                                      |
|-------------------------------------------------------------------|----------------------------------------|----------------------------------------|------------------------------------------------------|
|                                                                   | <b>COVID-19 with N=138<sup>8</sup></b> | <b>Influenza with N=20<sup>9</sup></b> | <b>Negative for Influenza with N=400<sup>9</sup></b> |
| <b>Fever</b>                                                      | <b>0.986</b>                           | <b>0.450</b>                           | <b>0.183</b>                                         |
| <b>Cough</b>                                                      | <b>0.594</b>                           | <b>0.750</b>                           | <b>0.298</b>                                         |
| <b>Nausea/Vomiting*</b>                                           | <b>0.101</b>                           | <b>0.010**</b>                         | <b>0.010**</b>                                       |
| <b>Diarrhea</b>                                                   | <b>0.101</b>                           | <b>0.010**</b>                         | <b>0.010**</b>                                       |

\*Nausea and vomiting are reported separately for the COVID-19 dataset here. We assume most people with nausea, frequency of 0.101, have vomiting, frequency of 0.036, and therefore we use nausea's frequency here.

\*\*Although adult patients at times may experience vomiting and diarrhea when infected with influenza, these symptoms are rare<sup>5</sup>. Therefore we approximate the frequency of these symptoms as 0.010 in this case.

#### **Supplemental Table 5 Frequencies of Four Symptoms from Various Clinical Datasets to Determine Sensitivity and Specificity**

Independent frequencies that were used to simulate patients in order to determine the sensitivity and specificity of first symptoms as early indicators.

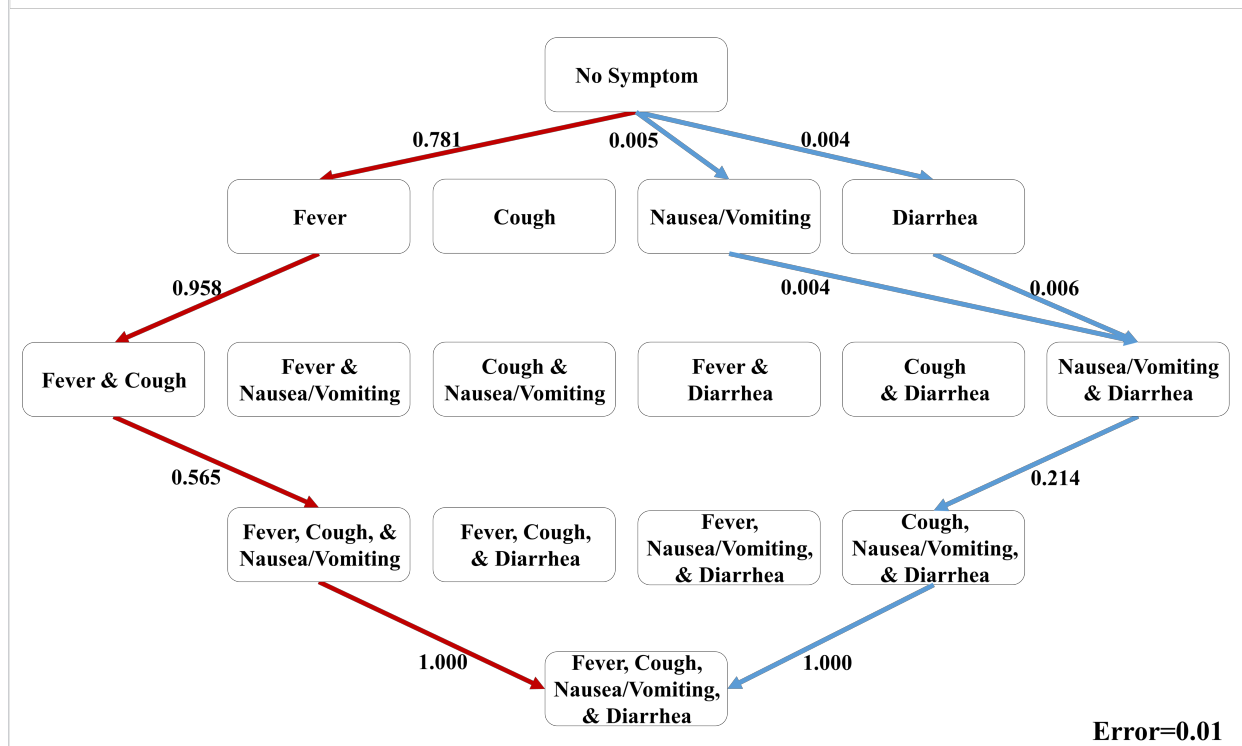

**Supplemental Figure 1 Stochastic Progression Model of Four Symptoms for COVID-19 with N=1,099<sup>2</sup>**

The most (red) and least (blue) likely paths of discernible symptoms for COVID-19 with N=1,099. Used as a confirmation set.

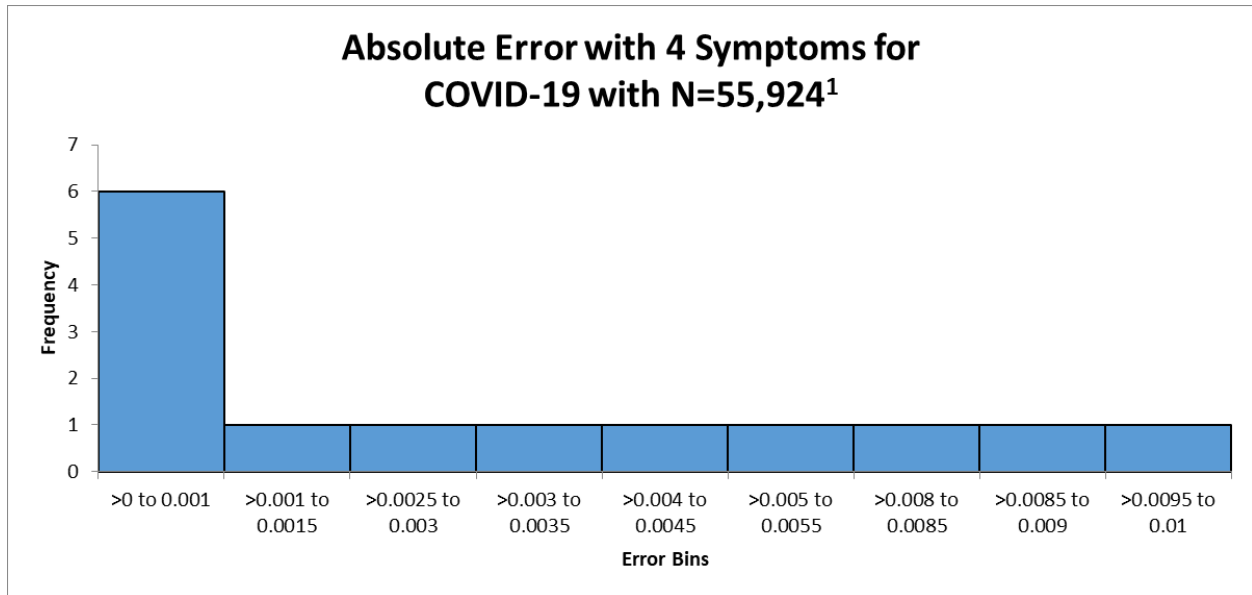

**Supplemental Figure 2 Absolute Error Distribution in COVID-19 with N=55,924 for Discernible Symptoms**

Maximum error of this distribution was used as a conservative value to discern differences in transition probabilities for likely paths.

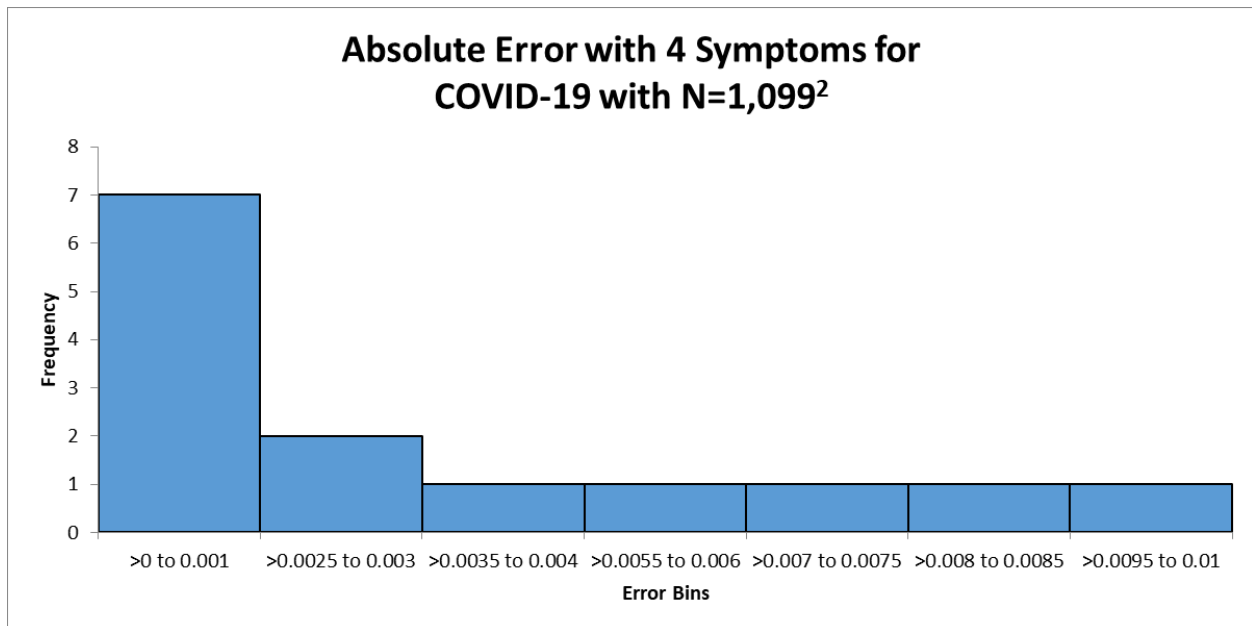

**Supplemental Figure 3 Absolute Error Distribution in COVID-19 with N=1,099 for Discernible Symptoms**

Maximum error of this distribution was used as a conservative value to discern differences in transition probabilities for likely paths.

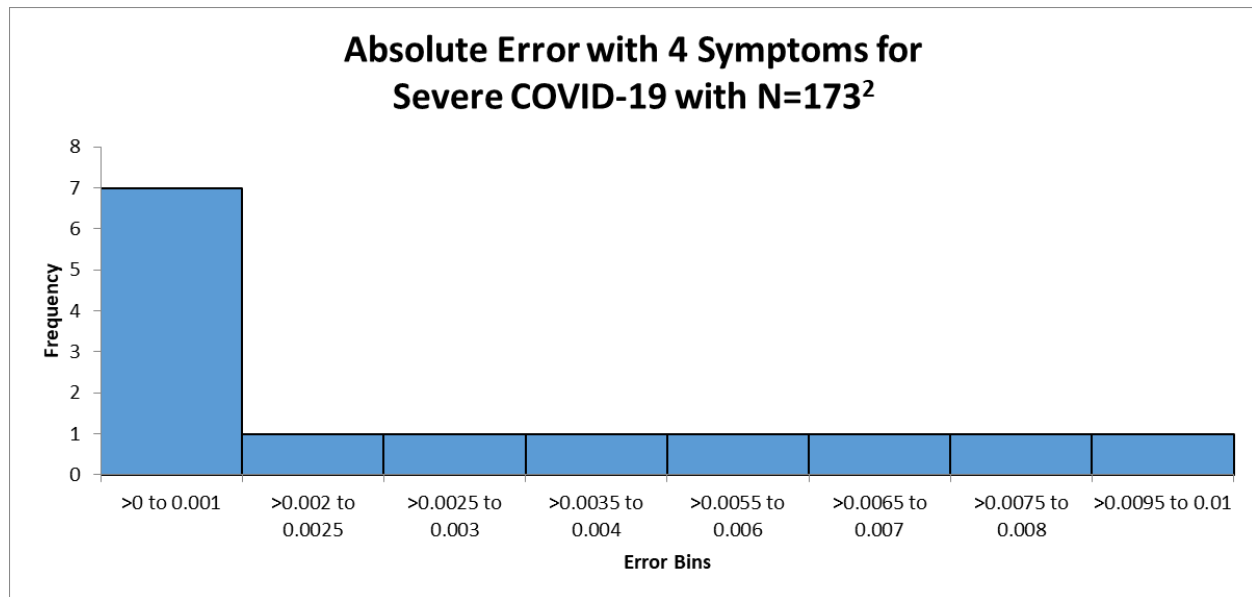

**Supplemental Figure 4 Absolute Error Distribution in Severe COVID-19 with N=173 for Discernible Symptoms**

Maximum error of this distribution was used as a conservative value to discern differences in transition probabilities for likely paths.

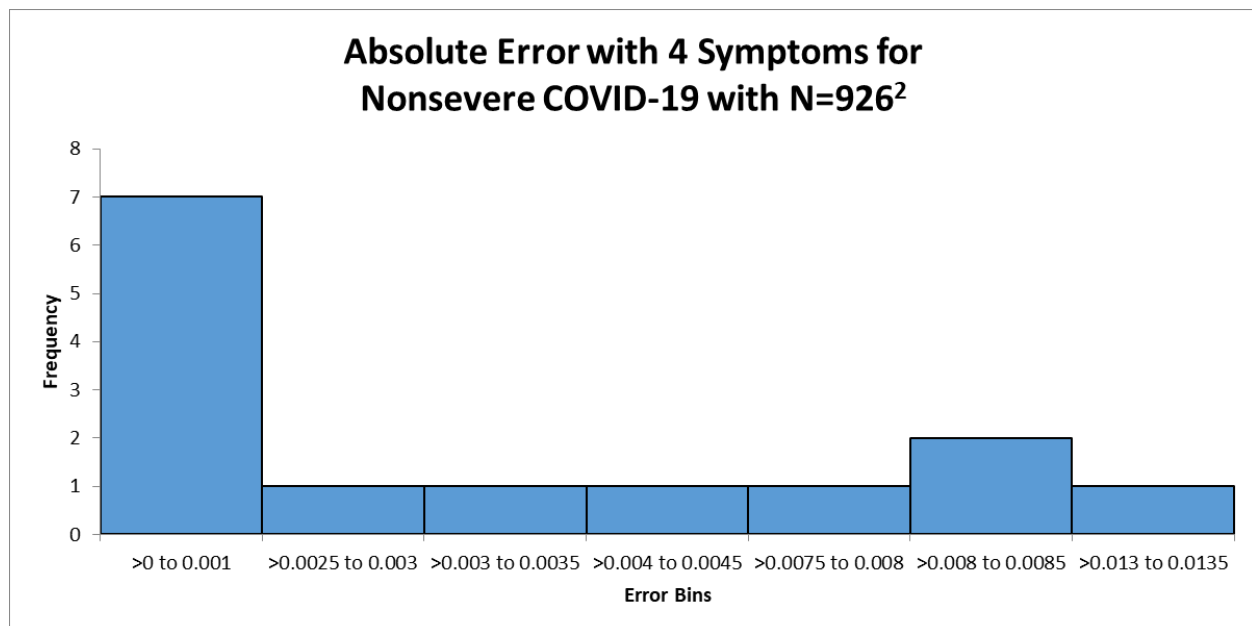

**Supplemental Figure 5 Absolute Error Distribution in Nonsevere COVID-19 with N=926 for Discernible Symptoms**

Maximum error of this distribution was used as a conservative value to discern differences in transition probabilities for likely paths.

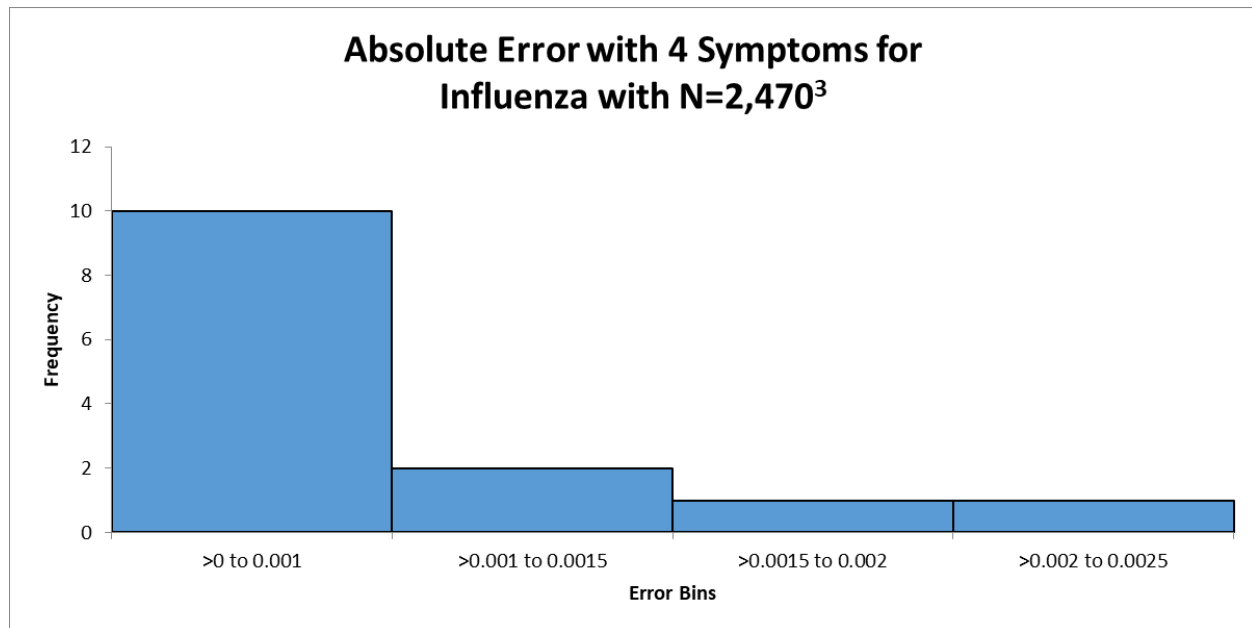

**Supplemental Figure 6 Absolute Error Distribution in Influenza with N=2470 for Discernible Symptoms**

Maximum error of this distribution was used as a conservative value to discern differences in transition probabilities for likely paths.

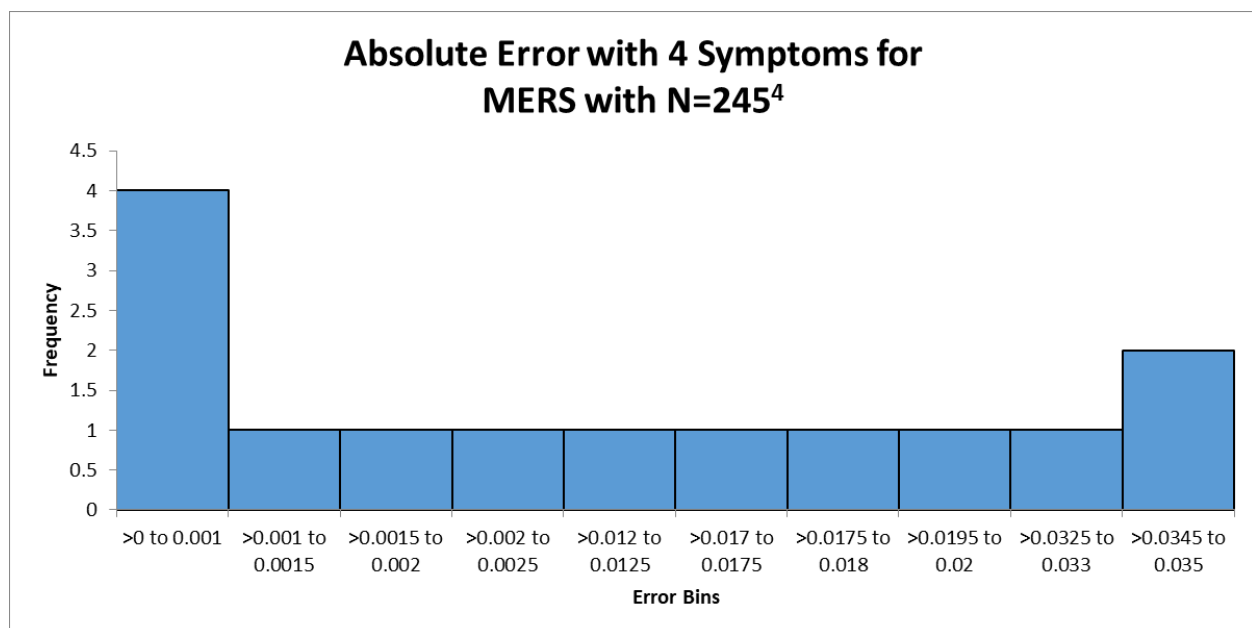

**Supplemental Figure 7 Absolute Error Distribution in MERS with N=245 for Discernible Symptoms**

Maximum error of this distribution was used as a conservative value to discern differences in transition probabilities for likely paths.

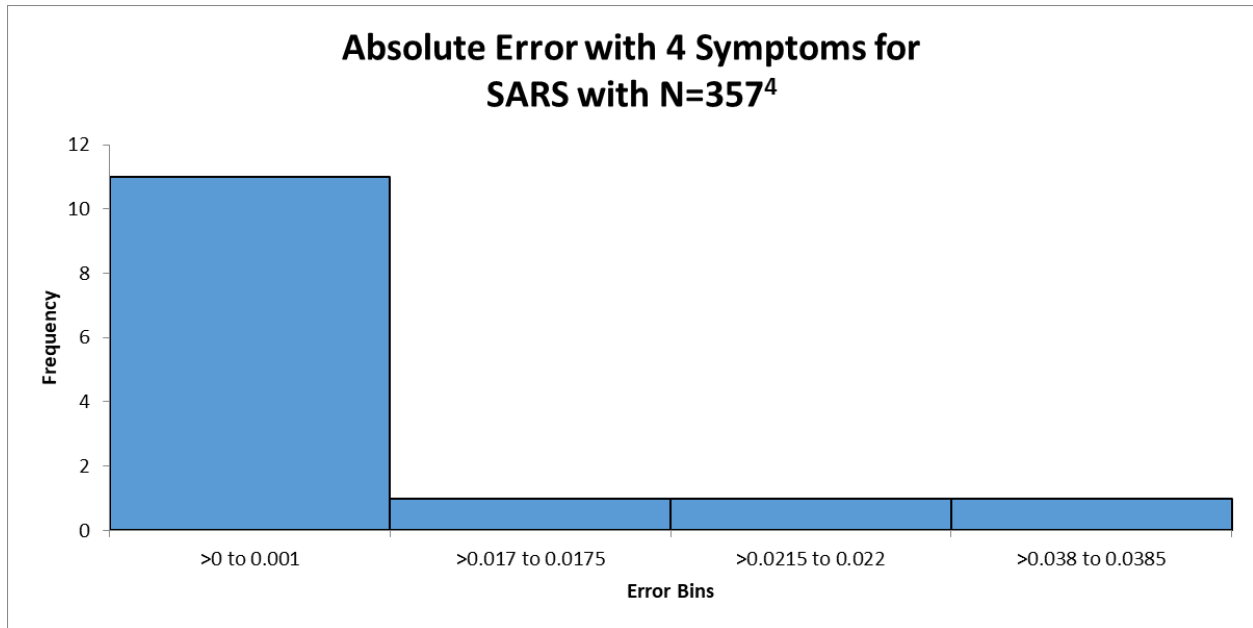

**Supplemental Figure 8 Absolute Error Distribution in SARS with N=357 for Discernible Symptoms**

Maximum error of this distribution was used as a conservative value to discern differences in transition probabilities for likely paths.

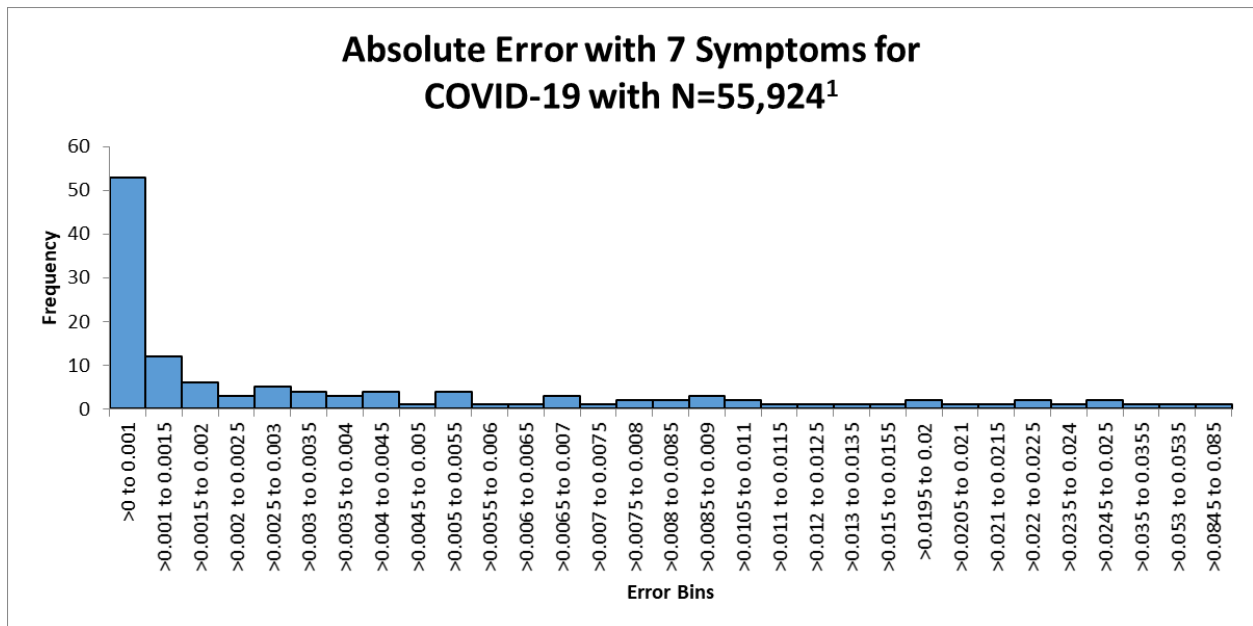

**Supplemental Figure 9 Absolute Error Distribution in COVID-19 with N=55,924 for Common Symptoms in Respiratory Diseases**

Maximum error of this distribution was used as a conservative value to discern differences in transition probabilities for likely paths.



Maximum error of this distribution was used as a conservative value to discern differences in transition probabilities for likely paths.

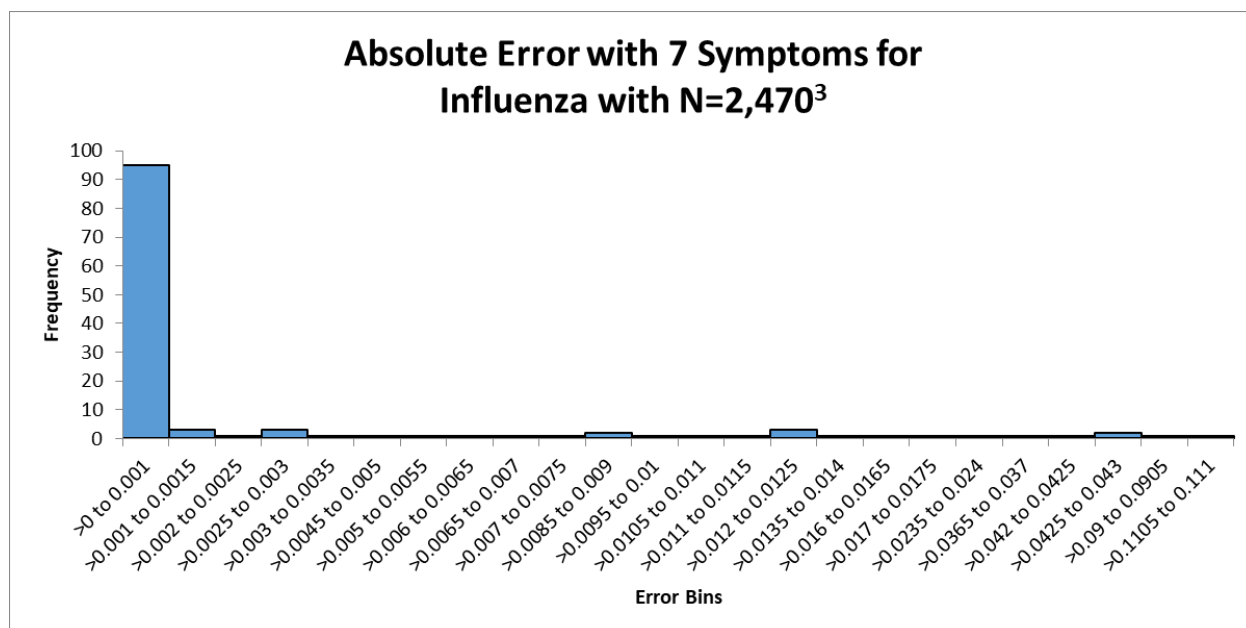

Maximum error of this distribution was used as a conservative value to discern differences in transition probabilities for likely paths.

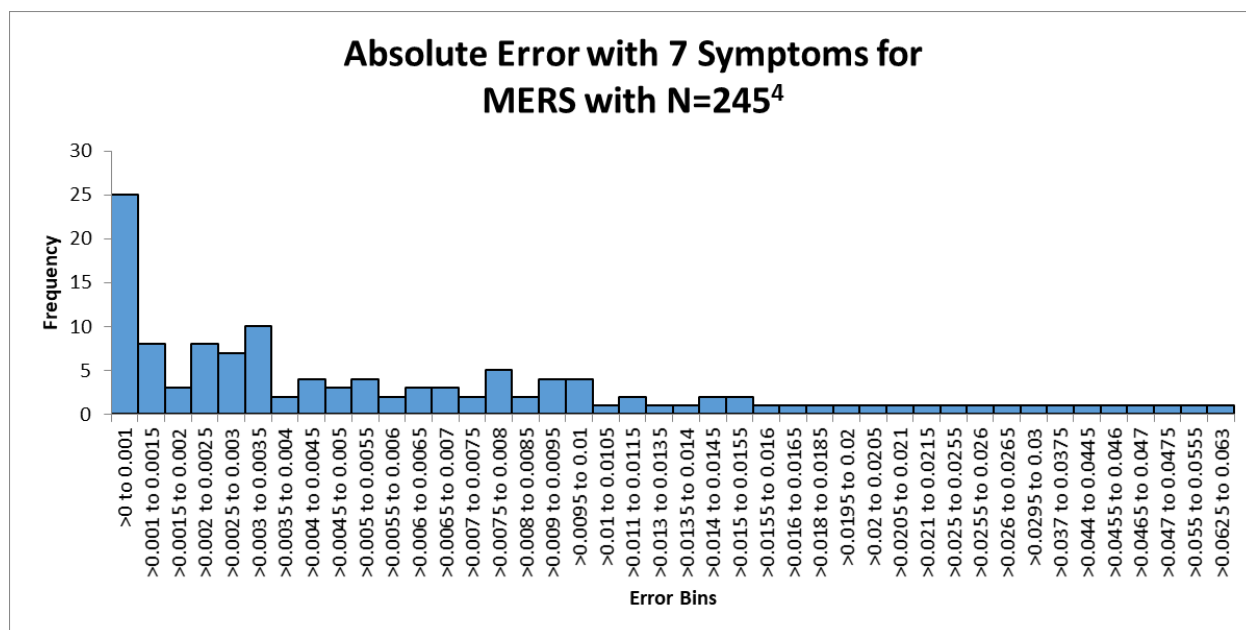

**Supplemental Figure 12 Absolute Error Distribution in MERS with N=245 for Common Symptoms in Respiratory Diseases**

Maximum error of this distribution was used as a conservative value to discern differences in transition probabilities for likely paths.

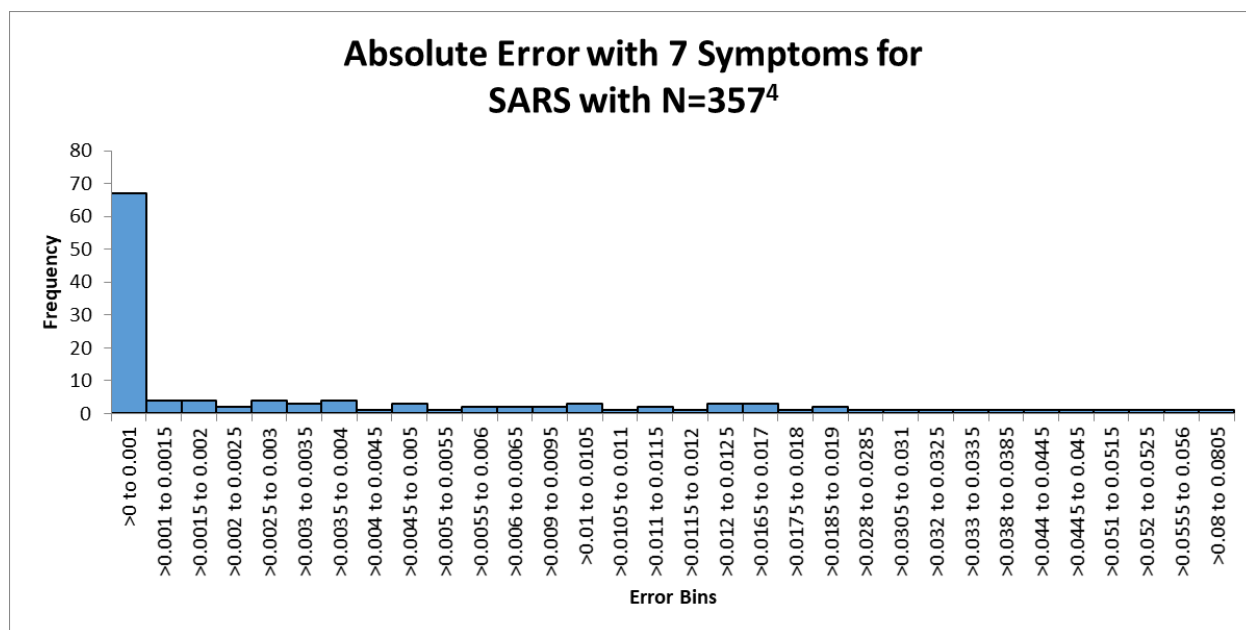

**Supplemental Figure 13 Absolute Error Distribution in SARS with N=357 for Common Symptoms in Respiratory Diseases**

Maximum error of this distribution was used as a conservative value to discern differences in transition probabilities for likely paths.

## References

1. Organization, W.H. and W.H. Organization, *Report of the who-china joint mission on coronavirus disease 2019 (covid-19)*. Available on-line: <https://www.who.int/docs/default-source/coronaviruse/who-china-joint-mission-on-covid-19-final-report.pdf>, 2020.
2. Guan, W.-j., et al., *Clinical characteristics of coronavirus disease 2019 in China*. New England Journal of Medicine, 2020.
3. Monto, A.S., et al., *Clinical signs and symptoms predicting influenza infection*. Archives of internal medicine, 2000. **160**(21): p. 3243-3247.
4. Yin, Y. and R.G. Wunderink, *MERS, SARS and other coronaviruses as causes of pneumonia*. Respiriology, 2018. **23**(2): p. 130-137.
5. Chan, M.C., et al., *Seasonal influenza A virus in feces of hospitalized adults*. Emerging infectious diseases, 2011. **17**(11): p. 2038.
6. Ko, J.-H., et al., *Predictive factors for pneumonia development and progression to respiratory failure in MERS-CoV infected patients*. Journal of Infection, 2016. **73**(5): p. 468-475.
7. Booth, C.M., et al., *Clinical features and short-term outcomes of 144 patients with SARS in the greater Toronto area*. Jama, 2003. **289**(21): p. 2801-2809.
8. Wang, D., et al., *Clinical characteristics of 138 hospitalized patients with 2019 novel coronavirus–infected pneumonia in Wuhan, China*. Jama, 2020.
9. Van den Dool, C., et al., *Symptoms of influenza virus infection in hospitalized patients*. Infection Control & Hospital Epidemiology, 2008. **29**(4): p. 314-319.
